# Supplementary material
Source: Elsevier journal article supplement (https://univ-rennes.hal.science/hal-01398046v1/file/mmc1.doc)

**SUPPORTING INFORMATION**

**Title** : Synthesis of a Trimannosylated-Equipped Archaeal Diether Lipid for the Development of Novel Glycoliposomes

**Author(s):** Julie Barbeau, Loïc Lemiègre,Allan Quelen, Virginie Malard,Haifei Gao,Cristine Gonçalves, Mathieu Berchel, Paul-Alain Jaffrès, Chantal Pichon, Patrick Midoux,* and Thierry Benvegnu*

Copies of NMR data 2

**Triallyl-benzyl-****pentaerythritol (5)**


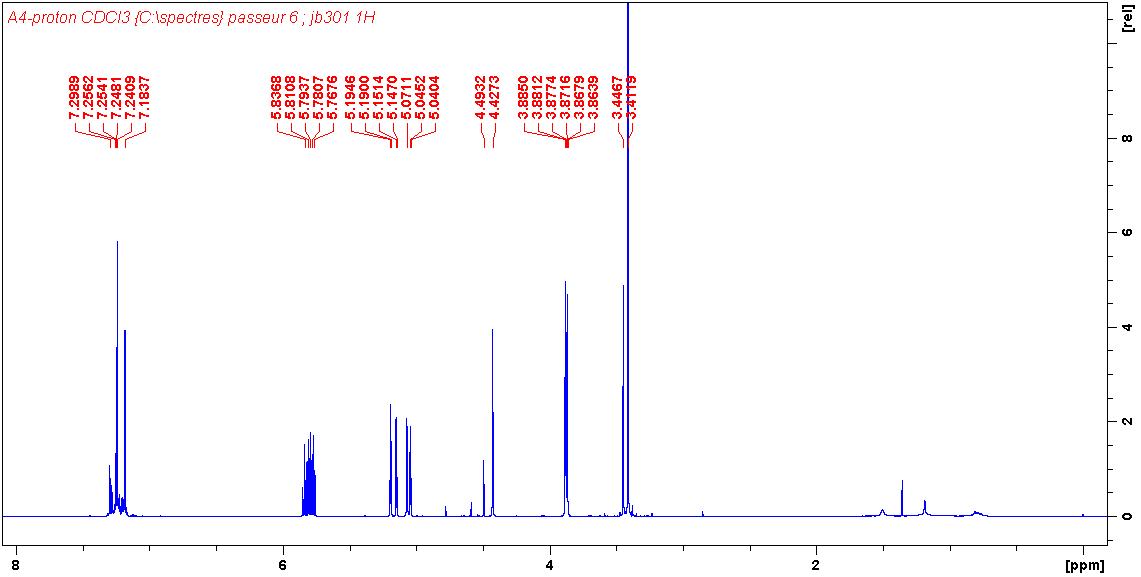


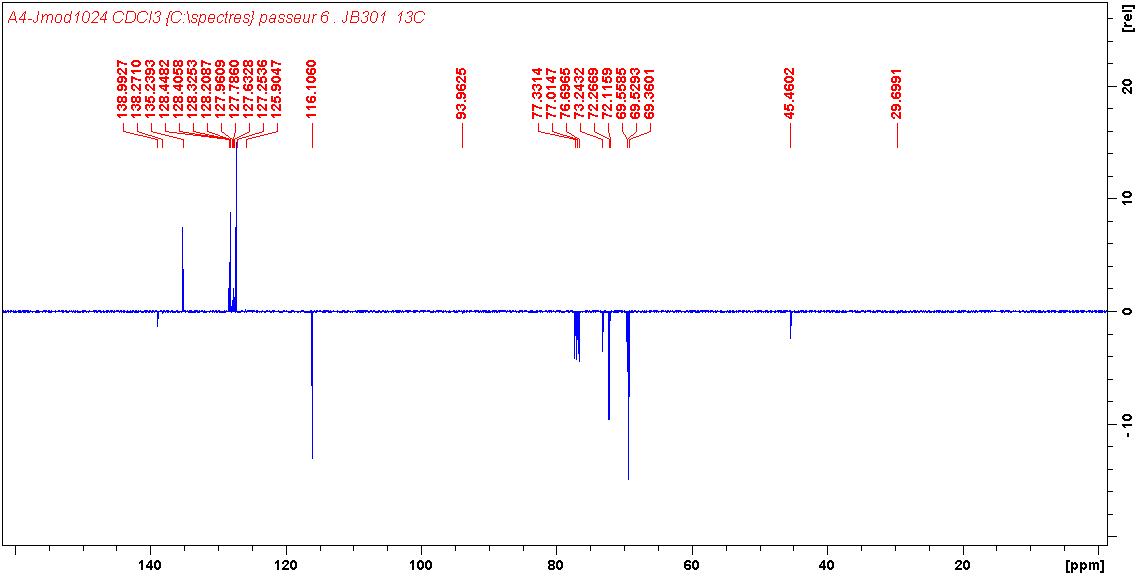


**Tri(3-hydroxypropyl)-benzyl-pentaerythritol (6):**


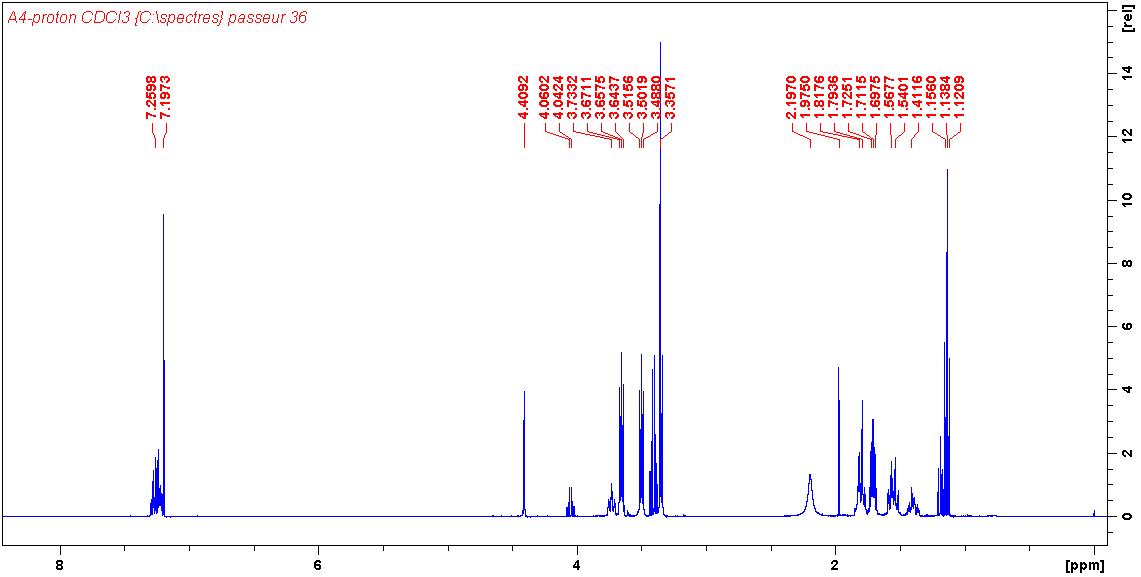


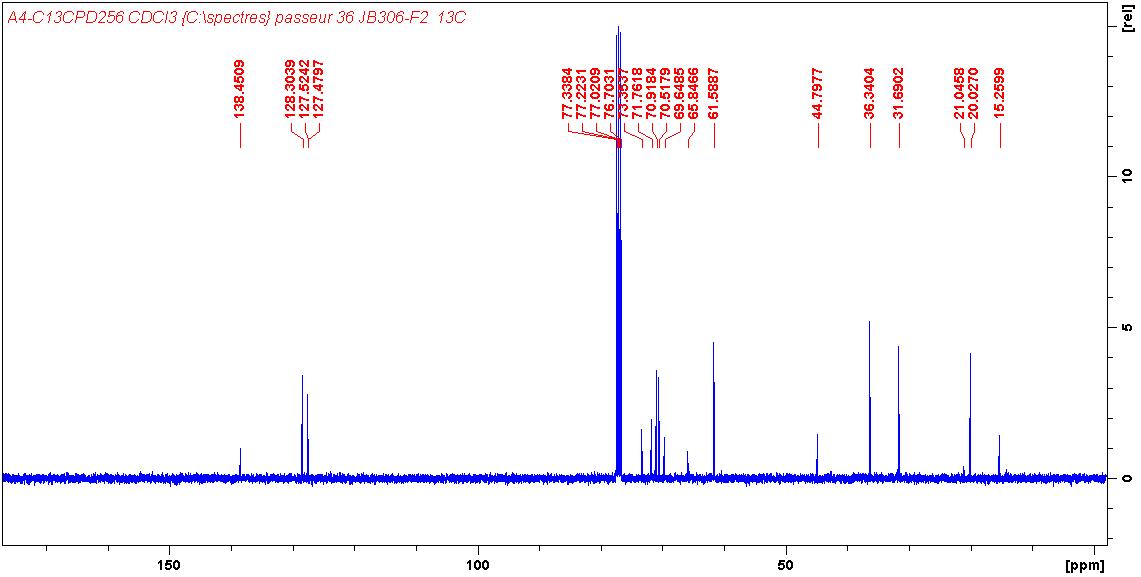


**Tri(3-allyloxypropyl)-benzyl-pentaerythritol (7):**


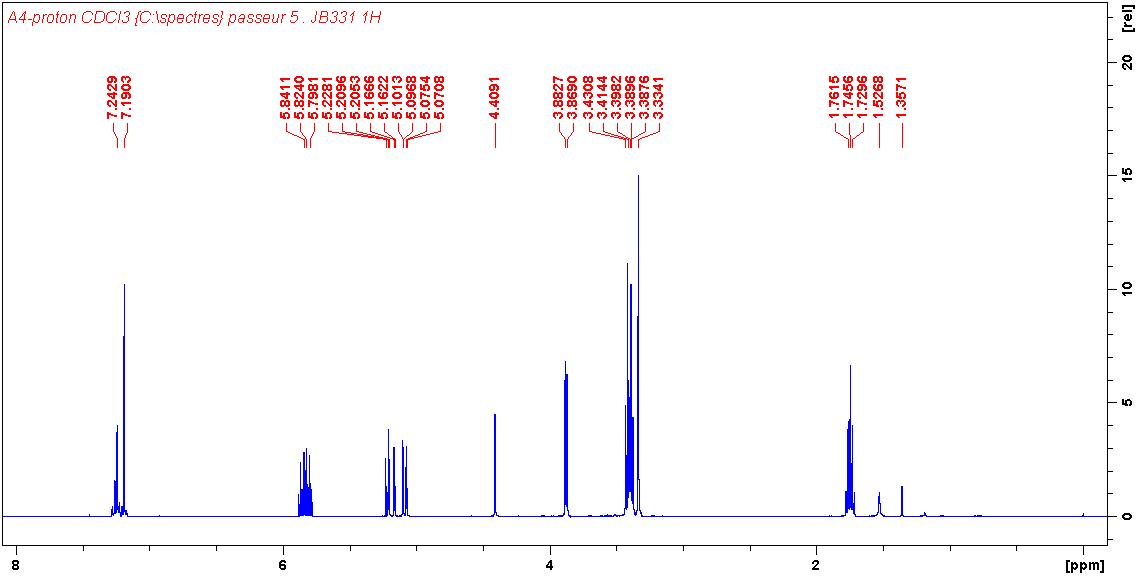


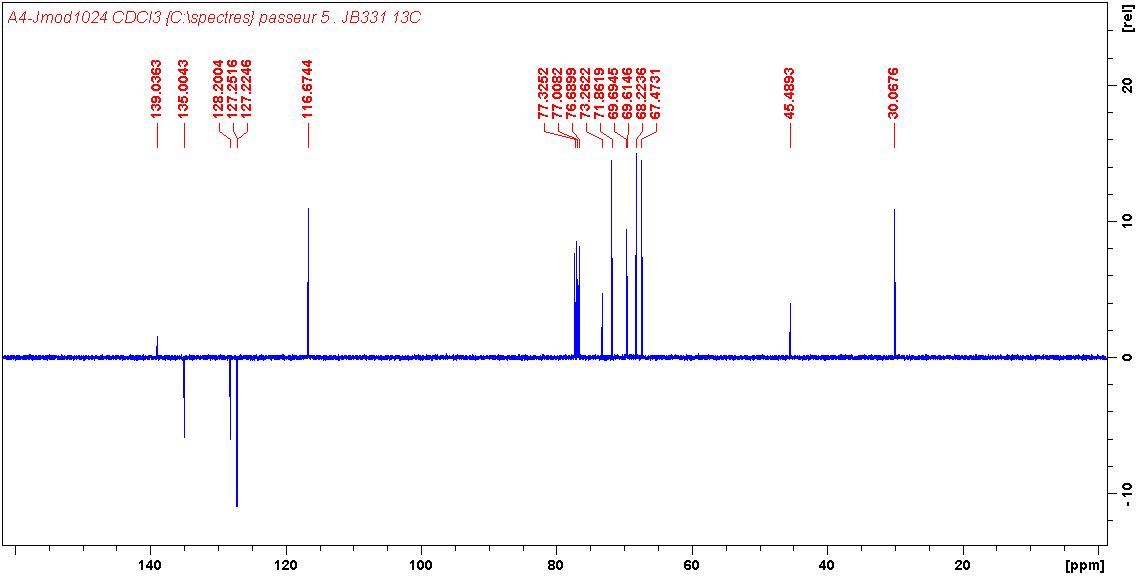


**Tri(****3-hydroxypropyloxypropyl)-benzyl-pentaerythritol (8):**


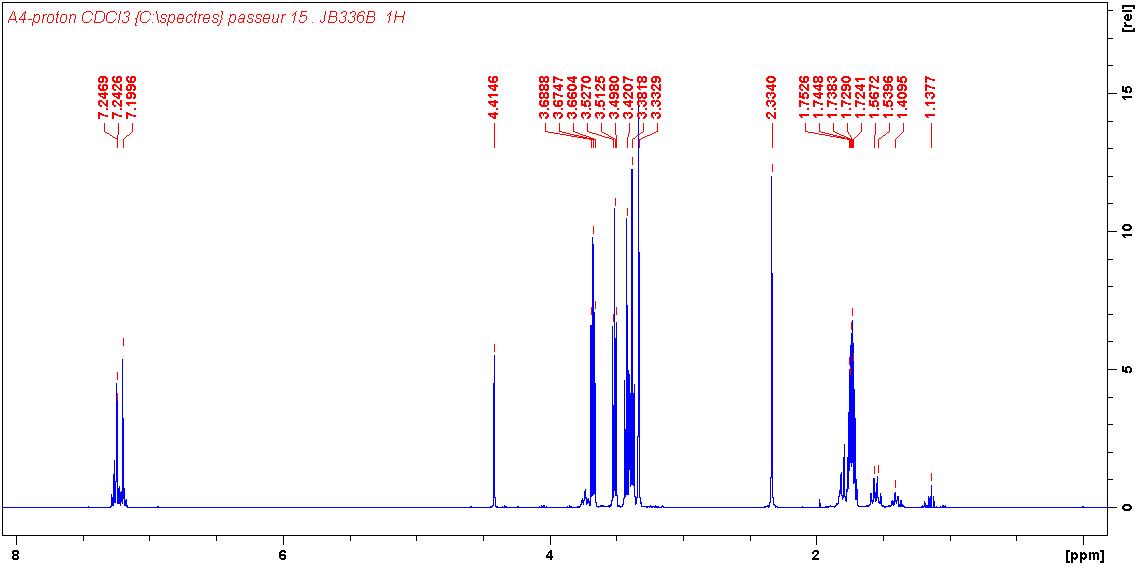


**TriMan-CH2OBn (10):**


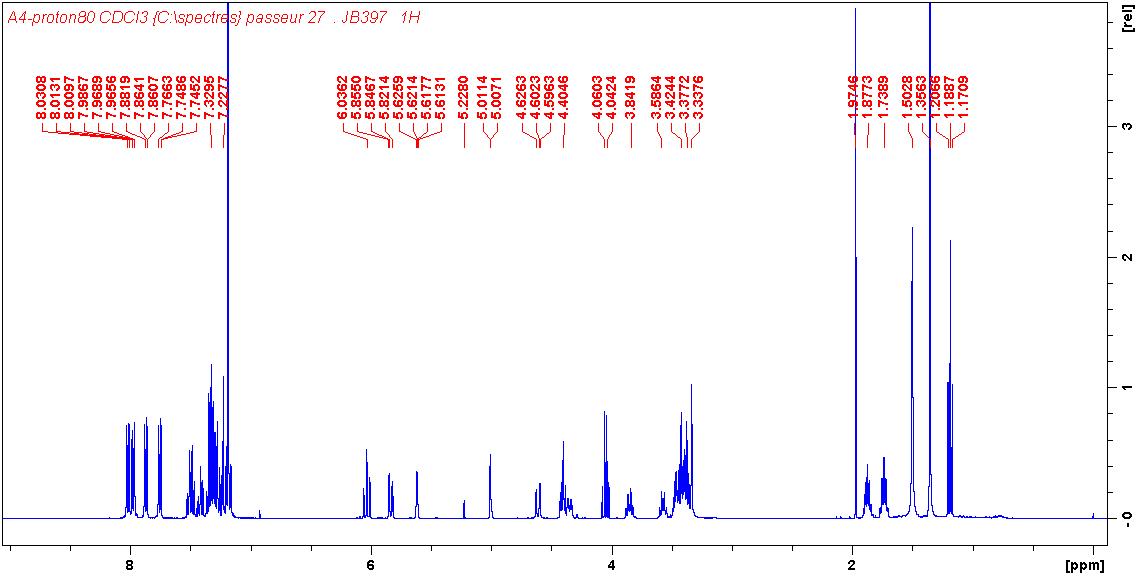


**TriMan-COOH** **(2):**


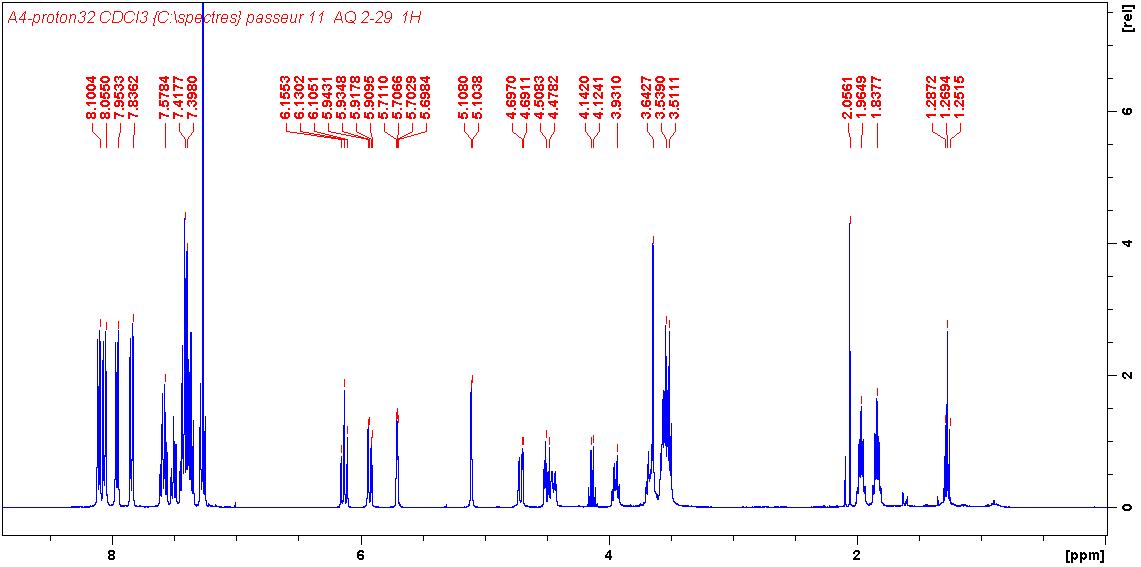


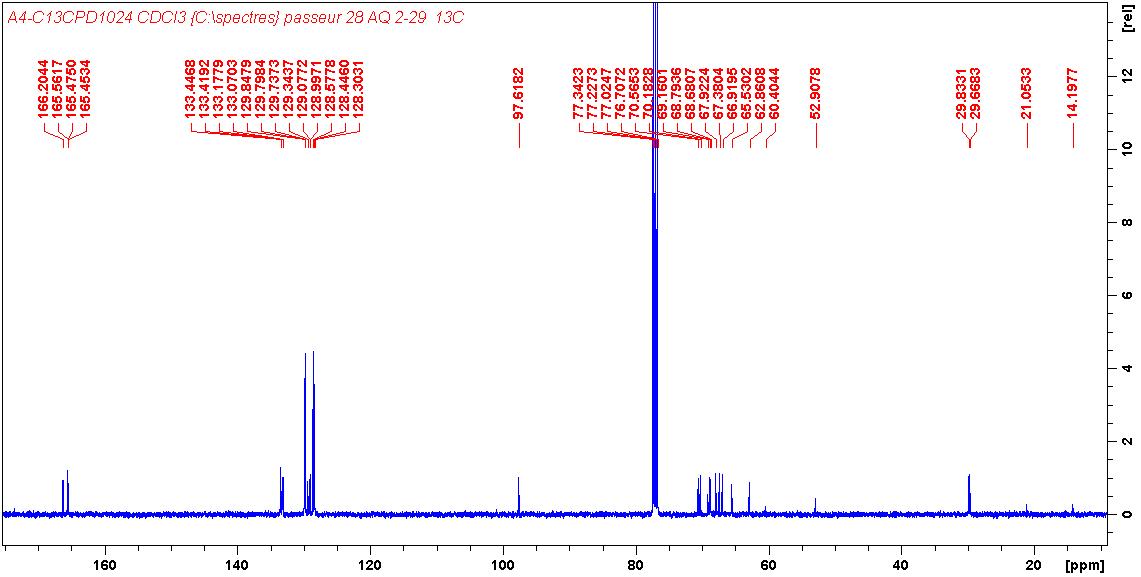


**N3-PEG350-diether** **(13):**


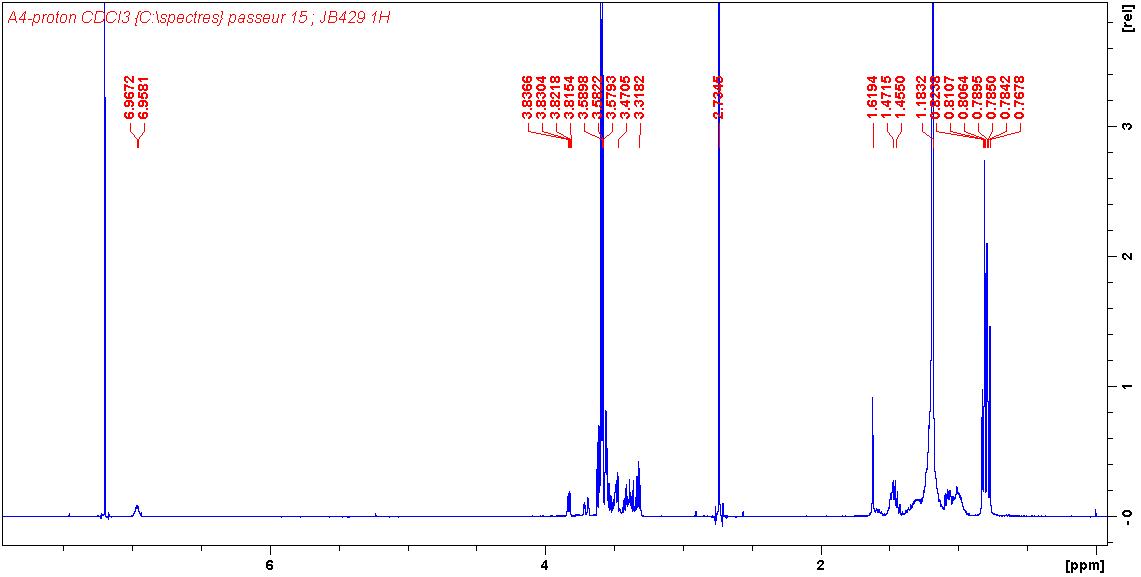


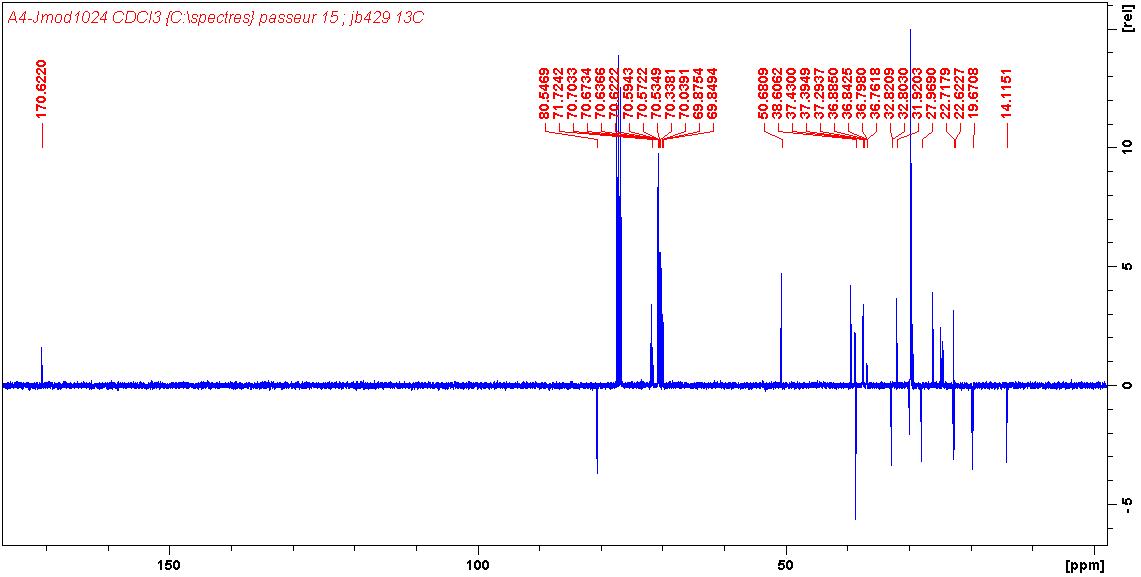


**NH2-PEG350-diether (3):**


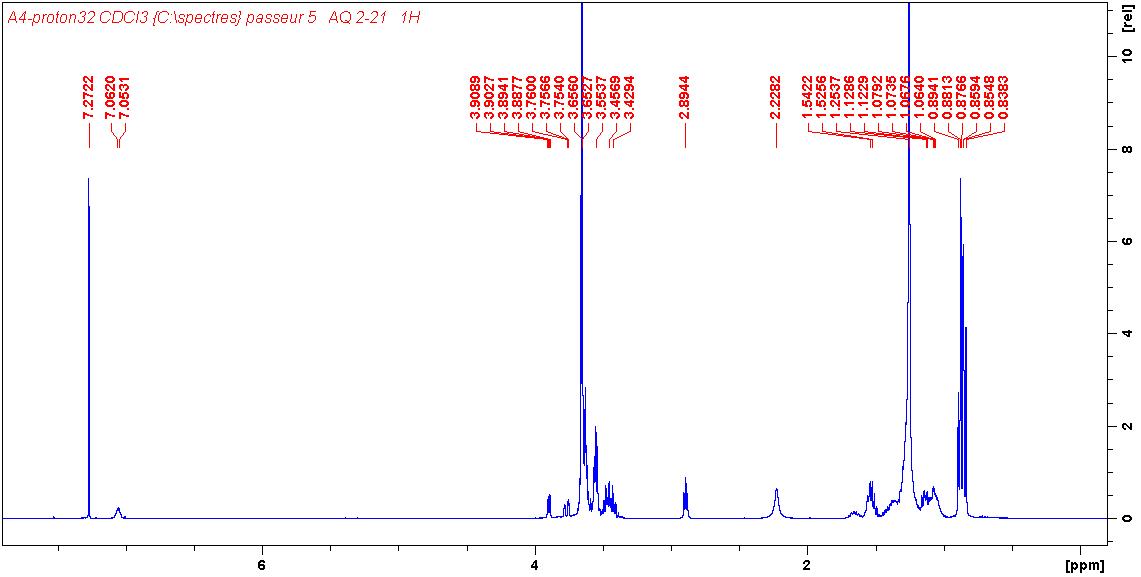


**Perbenzoyl-TriMan-PEG350-diether (14):**


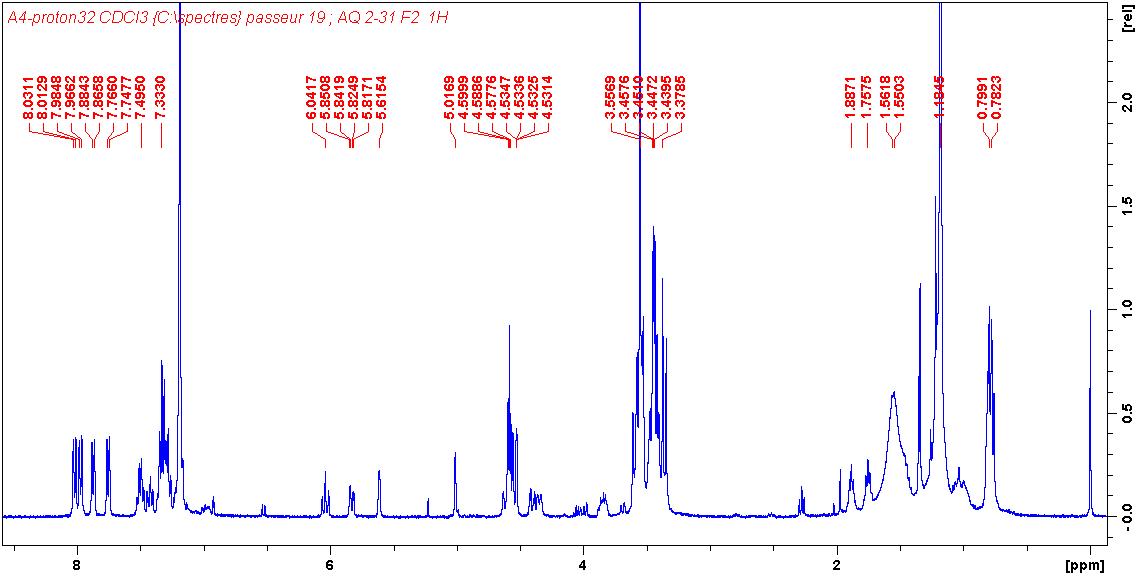


**TriMan-PEG350-diether (1):**


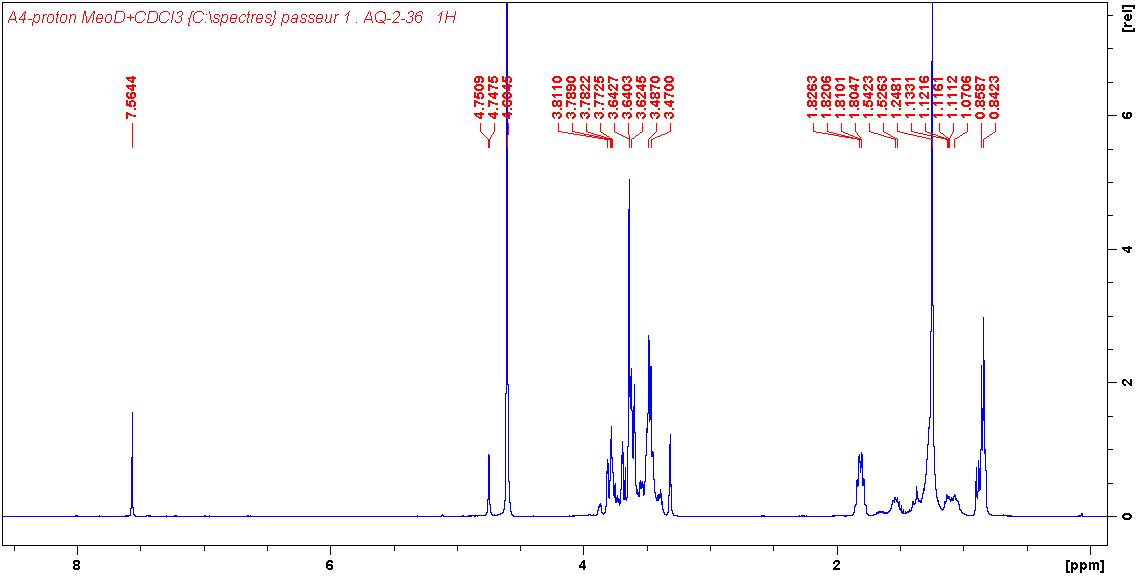


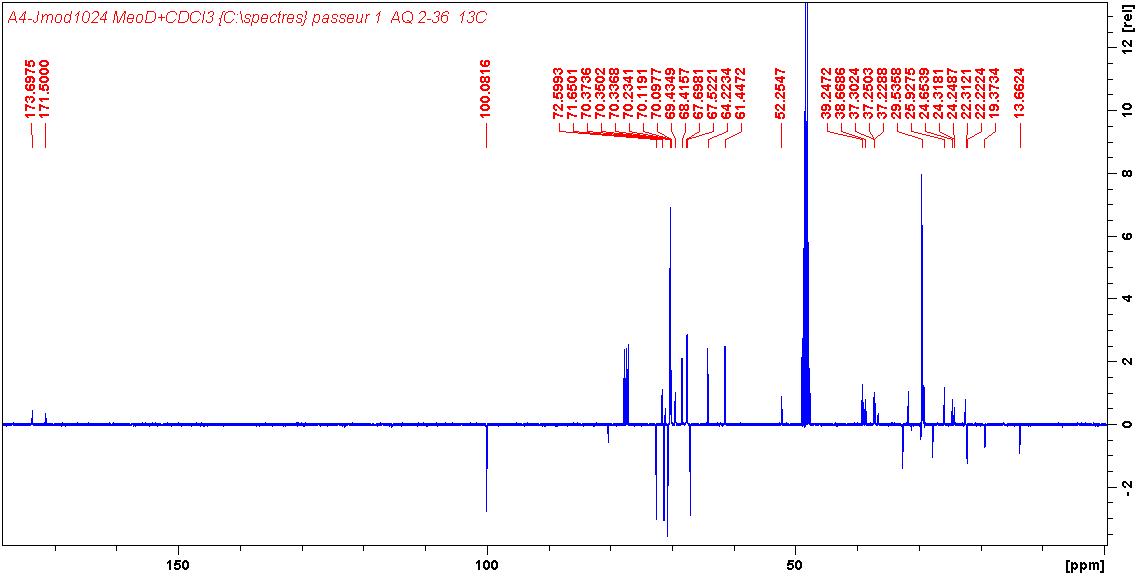

Supplement: mmc1 [file mmc1.doc]
